# Supplementary material
Source: publisher site journal article supplement (https://www.spandidos-publications.com/1702/downloadSupplementary)

Figure S1. sip32 leads to a decrease in  $[Ca^{2+}]$  in only mitochondria, not in the ER. In HUVECs, sip32 incubation exhibited reduced (A)  $[Ca^{2+}]_m$ , but (B)  $[Ca^{2+}]_{ER}$  was not altered. (C) sip32 significantly reduced the protein level of p32. \* $P < 0.01$  vs. untreated. HUVEC, human umbilical vein endothelial cell; ER, endoplasmic reticulum; ad, adenovirus;  $[Ca^{2+}]_m$ , mitochondrial calcium concentration;  $[Ca^{2+}]_{ER}$ , ER calcium concentration; si, small interfering; scm, scramble.

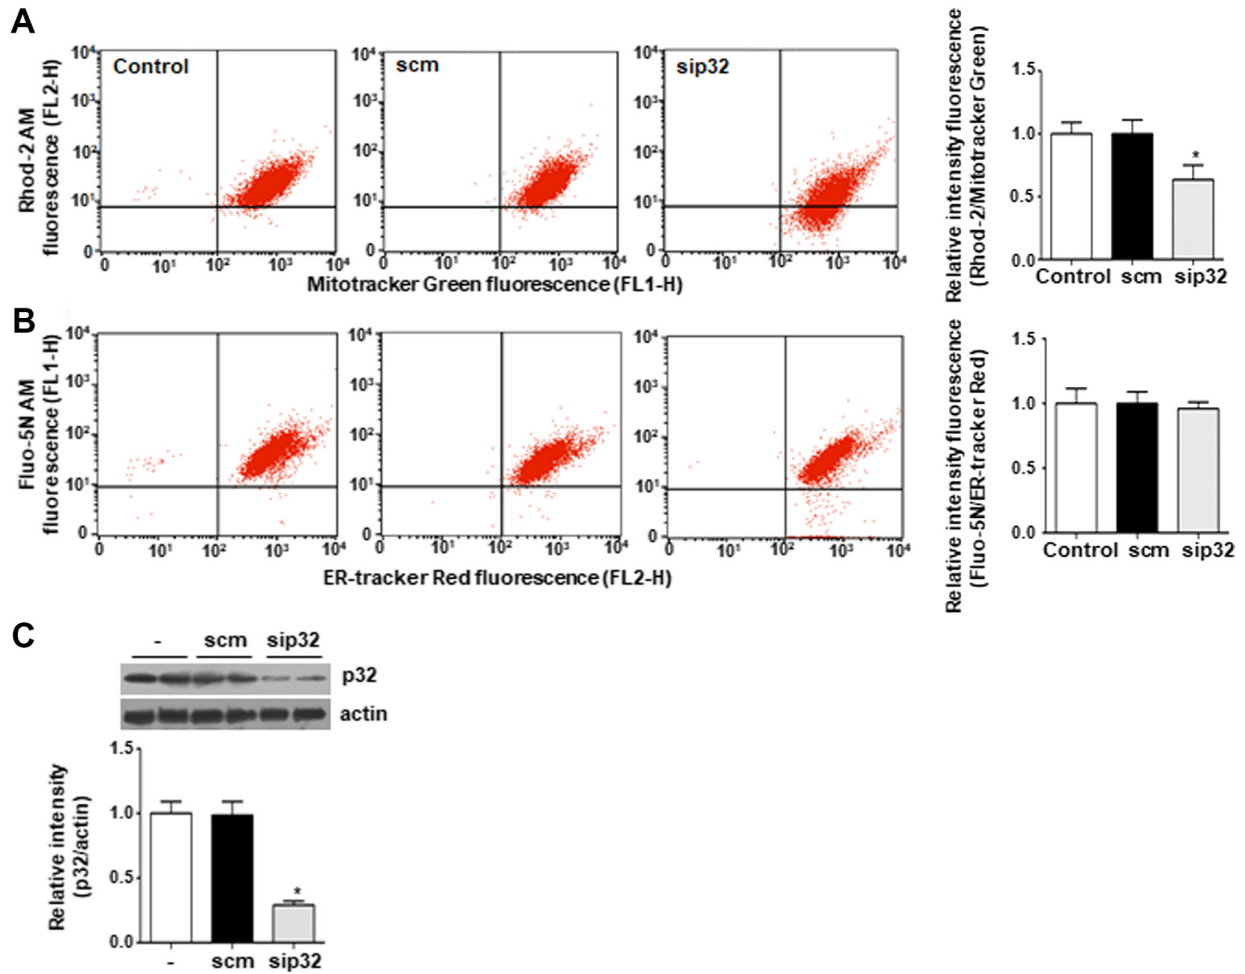

Supplement: Supplementary file 1 [file downloadSupplementary]
